# Supplementary material for: Efficacy and Safety of Bifidobacterium longum Supplementation in Infants: A Meta-Analysis of Randomized Controlled Trials
Source: MDPI journal article supplement (doi:10.3390/foods12244451), 2023-12-12
Supplement: s1 [file s1]

## *Supplementary Material*

### **Efficacy and Safety of Bifidobacterium Longum Supplementation in Infants: A Meta-analysis of Randomized Controlled Trials**

Huangda Guo, BS<sup>1</sup>, Meng Fan, MS<sup>1</sup>, Tianjiao Hou, BS<sup>1</sup>, Yixin Li, BS<sup>1</sup>, Siyue Wang, MPH<sup>1</sup>, Xueheng Wang<sup>1</sup>, Hexiang Peng, MS<sup>1</sup>, Mengying Wang, PhD<sup>3</sup>, Tao Wu, PhD<sup>1, 2, \*</sup>, Yumei Zhang, PhD<sup>3, \*</sup>

**\* Correspondence:**

Tao Wu, Department of Epidemiology and Biostatistics, School of Public Health, Peking University, Beijing, 100191, China. E-mail: twu@bjmu.edu.cn

Yumei Zhang, Department of Nutrition and Food Hygiene, School of Public Health, Peking University, Beijing, 100191, China. E-mail: zhangyumei@bjmu.edu.cn

#### **1 Supplementary Data**

None.

#### **2 Supplementary Figures and Tables**

**Table S1 Detailed literature search information**

| Databases | Search terms                                                                                                                                                                                                                                                                                                                                                                                                                                                                                                                                                                                             |
|-----------|----------------------------------------------------------------------------------------------------------------------------------------------------------------------------------------------------------------------------------------------------------------------------------------------------------------------------------------------------------------------------------------------------------------------------------------------------------------------------------------------------------------------------------------------------------------------------------------------------------|
| PubMed    | (Bifidobacterium longum [MeSH Terms] OR Bifidobacteri* OR BISP * OR B. longum OR B. longum subsp. longum) OR (Bifidobacterium longum subspecies infantis [MeSH Terms] OR Bifidobacterium infantis OR Bifidobacterium longum subsp. Infantis OR B. infantis OR Bifidobacterium longum subsp. infantis OR Bifidobacterium longum ssp. infantis OR B. longum subsp. infantis )AND ((Infant* OR Infant, Newborn [MeSH Terms]OR newborn OR neonat*) OR (Child* OR Child, Preschool [MeSH Terms] OR children* OR young* OR toddler))AND (Randomized Controlled Trial* OR Controlled Clinical Trial* OR Trials) |
| EMBASE    | Bifidobacterium longum'/exp OR ' Bifidobacterium*' OR 'BISP*' OR 'B. longum' OR 'B. longum subsp. Longum' OR ('Bifidobacterium longum subspecies infantis'/exp OR 'Bifidobacterium infantis' OR 'Bifidobacterium longum subsp. Infantis' OR 'B. infantis OR Bifidobacterium longum subsp. Infantis' OR 'Bifidobacterium longum ssp. Infantis' OR 'B. longum subsp. Infantis' ) AND (('Infant' /exp OR 'Newborn' OR 'neonat*') OR ('Child'/exp OR 'Preschool' OR 'Child*' OR 'young*' OR 'toddler'))AND ('Randomized Controlled Trial'/exp OR 'Controlled Clinical Trial' OR 'Trial')                     |

Cochrane Library

SinoMed

(Bifidobacterium longum [MeSH Terms] OR Bifidobacteri\* OR  
 BISP \* OR B. longum OR B. longum subsp. longum) OR  
 (Bifidobacterium longum subspecies infantis [MeSH Terms] OR  
 Bifidobacterium infantis OR Bifidobacterium longum subsp. Infantis  
 OR B. infantis OR Bifidobacterium longum subsp. infantis OR  
 Bifidobacterium longum ssp. infantis OR B. longum subsp.  
 infantis )AND ((Infant\* OR Infant, Newborn [MeSH Terms]OR  
 newborn OR neonat\*) OR (Child\* OR Child, Preschool [MeSH  
 Terms] OR children\* OR young\* OR toddler))AND (Randomized  
 Controlled Trial\* OR Controlled Clinical Trial\* OR Trials)  
 ("随机对照试验"[全部字段:智能] OR "临床试验"[全部字段:智能]  
 OR "试验"[全部字段:智能]) AND ("婴儿"[全部字段:智能] OR "婴  
 幼儿"[全部字段:智能] OR "幼儿"[全部字段:智能] OR "学龄前  
 "[全部字段:智能] OR "儿童"[全部字段:智能]) AND ("长双歧杆菌  
 "[全部字段:智能] OR "长双歧杆菌长亚种"[全部字段:智能] OR "  
 长双歧杆菌婴儿亚种"[全部字段:智能])

---

**Table S2 Detailed description of basic characteristics of the studies included in the meta-analysis**

| Study              | Publication year | Country | Patients <sup>1</sup> | Female | Birth weight (g) | Gestational age (week) | Cesarean <sup>1</sup> | Postnatal age at starting (month) | Probiotic strains                                                                   | dose (CFU /d)     | Duration of supplementation | Antibiotic exposure | Type of milk feeding | Outcomes <sup>2</sup> |
|--------------------|------------------|---------|-----------------------|--------|------------------|------------------------|-----------------------|-----------------------------------|-------------------------------------------------------------------------------------|-------------------|-----------------------------|---------------------|----------------------|-----------------------|
| Al-Hosni et al.(6) | 2012             | America | 50/51                 | 49.50% | 778              | 26                     | 22/30                 | 4                                 | Bifidobacterium longum infantis, Lactobacillus rhamnosus GG                         | 5×10 <sup>8</sup> | 34 weeks                    | no                  | breast milk          | a                     |
| Mark et al.(20)    | 2006             | America | 31/29                 | 36.70% | 1428             | 30                     | 23/23                 | 7                                 | Bifidobacterium longum infantis, Lactobacillus acidophilus, Bifidobacterium bifidum | 5×10 <sup>8</sup> | 5 weeks                     | no                  | -                    | a                     |

|                              |      |               |             |            |          |    |       |    |                                                                                                                                              |                    |          |     |                    |         |
|------------------------------|------|---------------|-------------|------------|----------|----|-------|----|----------------------------------------------------------------------------------------------------------------------------------------------|--------------------|----------|-----|--------------------|---------|
| Shashi<br>dhar et<br>al.(24) | 2017 | India         | 52/52       | 54.8<br>0% | 122<br>3 | 31 | 27/38 | 0  | Bifidobact<br>erium<br>longum,<br>Lactobacill<br>us<br>acidophilus<br>,<br>Lactobacill<br>us<br>rhamnosus,<br>Saccharom<br>yces<br>boulardii | $1.25 \times 10^9$ | 4 weeks  | no  | breas<br>t<br>milk | a, b, d |
| Qiao et<br>al.(22)           | 2017 | China         | 30/30       | 55.0<br>0% | 159<br>3 | 32 | -/-   | 0  | Bifidobact<br>erium<br>longum,<br>Lactobacill<br>us<br>acidophilus<br>and<br>Enterococc<br>us faecalis                                       | $1 \times 10^7$    | 2 weeks  | yes | breas<br>t<br>milk | a, c    |
| Agus et<br>al.(15)           | 2011 | Indon<br>esia | 199/1<br>94 | 48.3<br>0% | -        | -  | -/-   | 12 | Bifidobact<br>erium<br>longum<br>BL999,<br>Lactobacill<br>us<br>rhamonosu<br>s LPR                                                           | $3 \times 10^7$    | 64 weeks | no  | breas<br>t<br>milk | a, c, d |

|                             |      |               |             |            |          |    |             |   |                                                                                                                                                     |                    |         |     |                    |   |
|-----------------------------|------|---------------|-------------|------------|----------|----|-------------|---|-----------------------------------------------------------------------------------------------------------------------------------------------------|--------------------|---------|-----|--------------------|---|
| ALON<br>A et<br>al.(13)     | 2005 | Ameri<br>ca   | 72/73       | 44.1<br>0% | 113<br>1 | 30 | 56/57       | 0 | Bifidobact<br>eria<br>longum<br>infantis,<br>Streptococ<br>cus<br>thermophil<br>us,<br>Bifidobact<br>eria bifidus                                   | $1.05 \times 10^9$ | 6 weeks | yes | breas<br>t<br>milk | b |
| Hung-<br>Chih et<br>al.(18) | 2005 | China         | 180/1<br>87 | 49.9<br>0% | 108<br>7 | 28 | 104/10<br>0 | 0 | Bifidobact<br>erium<br>longum<br>infantis,<br>Lactobacill<br>us<br>acidophilus                                                                      | -                  | -       | no  | breas<br>t<br>milk | b |
| Jacobs<br>et al.(7)         | 2013 | Austra<br>lia | 548/5<br>51 | 52.0<br>0% | 105<br>5 | 28 | 359/37<br>7 | 0 | Bifidobact<br>erium<br>longum<br>infantis<br>(BB-02),<br>Streptococ<br>cus<br>thermophil<br>us (TH-4),<br>Bifidobact<br>erium<br>lactis (BB-<br>12) | $1 \times 10^9$    | -       | no  | breas<br>t<br>milk | b |

|                        |      |         |        |            |          |    |       |   |                                                                                         |                    |          |     |                                    |      |
|------------------------|------|---------|--------|------------|----------|----|-------|---|-----------------------------------------------------------------------------------------|--------------------|----------|-----|------------------------------------|------|
| Carole et al.(23)      | 2009 | France  | 45/49  | 42.6<br>0% | 108<br>5 | 28 | 28/35 | 0 | Bifidobacterium longum BB536, Lactobacillus rhamnosus GG                                | $1 \times 10^8$    | 2 weeks  | yes | breast milk and/or preterm formula | b, c |
| Bajorek et al.(12)     | 2021 | America | 15/15  | 60.0<br>0% | 146<br>8 | 31 | 10/13 | 0 | Bifidobacterium longum infantis EVC001                                                  | $8 \times 10^9$    | 4 weeks  | yes | breast milk                        | c, d |
| Jean et al.(14)        | 2008 | France  | 174/53 | 51.1<br>0% | 340<br>0 | 40 | 49/19 | 0 | Bifidobacterium longum BL999, Lactobacillus paracasei ST11, Lactobacillus rhamnosus LPR | $1.29 \times 10^8$ | 16 weeks | no  | -                                  | c    |
| Jean-Michel et al.(16) | 2011 | France  | 40/39  | 48.1<br>0% | 330<br>0 | 39 | 3/3   | 0 | Bifidobacterium longum (BL999)                                                          | $2 \times 10^7$    | 16 weeks | no  | preterm formula                    | c    |

|                     |      |        |        |        |      |    |        |   |                                                |                 |          |     |                                    |         |
|---------------------|------|--------|--------|--------|------|----|--------|---|------------------------------------------------|-----------------|----------|-----|------------------------------------|---------|
| Manzano et al.(19)  | 2017 | Spain  | 48/51  | 51.50% | -    | -  | 8/9    | 6 | Bifidobacterium longum infantis R0033          | $3 \times 10^9$ | 8 weeks  | no  | breast milk and/or preterm formula | c       |
| Giuseppe et al.(21) | 2007 | Italy  | 42/55  | 53.60% | -    | 39 | 15/24  | 0 | Bifidobacterium longum BL999                   | $2 \times 10^7$ | 16 weeks | no  | preterm formula                    | c, d    |
| Stephane et al.(17) | 2015 | France | 145/52 | 48.70% | 1170 | 29 | 115/39 | 0 | Bifidobacterium longum, Bifidobacterium lactis | $1 \times 10^9$ | 3 weeks  | yes | breast milk and/or preterm formula | b, c, d |

<sup>1</sup> The left side of the slash is the intervention group and the right side is the control group

<sup>2</sup> a, weight gain; b, necrotizing enterocolitis; c, any adverse events; d, serious adverse events

**Table S3 Detailed description of the risk of bias assessment for each included study**

| Study                 | Bias                                               | Authors' judgement | Support for judgement                                                                                                  |
|-----------------------|----------------------------------------------------|--------------------|------------------------------------------------------------------------------------------------------------------------|
| Al-Hosni et al.(6)    | bias arising from the randomization process        | Unclear risk       | "randomised", no details reported.                                                                                     |
|                       | bias due to deviations from intended interventions | Low risk           | Participants were not aware of their assigned intervention during the trial.                                           |
|                       | bias due to missing outcome data                   | Low risk           | Equal and low dropout rates; ITT analysis used.                                                                        |
|                       | bias in the measurement of the outcome             | Unclear risk       | No information about if outcome assessors aware of the intervention.                                                   |
|                       | bias in selection of the reported results          | Unclear risk       | No protocol available.                                                                                                 |
| Mark et al.(20)       | bias arising from the randomization process        | Low risk           | Randomly assigned by the UC Davis Investigational Pharmacy based on a computer generated list; Allocation concealment. |
|                       | bias due to deviations from intended interventions | Low risk           | Double-blind.                                                                                                          |
|                       | bias due to missing outcome data                   | Low risk           | Equal dropout rates; ITT analysis used.                                                                                |
|                       | bias in the measurement of the outcome             | Unclear risk       | No information about if the method of measuring the outcome inappropriate.                                             |
|                       | bias in selection of the reported results          | Unclear risk       | No protocol available.                                                                                                 |
| Shashidhar et al.(24) | bias arising from the randomization process        | Unclear risk       | No statistical test results for baseline information.                                                                  |
|                       | bias due to deviations from intended interventions | Low risk           | Double-blind.                                                                                                          |
|                       | bias due to missing outcome data                   | Low risk           | Equal and low dropout rates; ITT analysis used.                                                                        |
|                       | bias in the measurement of the outcome             | Low risk           | Method of measuring the outcome appropriate; Double-blind.                                                             |
|                       | bias in selection of the reported results          | Low risk           | Data that produced this result analysed in accordance with a pre-specified analysis plan.                              |
| Qiao et al.(22)       | bias arising from the randomization process        | Low risk           | Computer-generated random numbers was used in the sequence generation proces                                           |



| Study                | Bias                                               | Authors' judgement | Support for judgement                                                                        |
|----------------------|----------------------------------------------------|--------------------|----------------------------------------------------------------------------------------------|
| Agus et al.(15)      | bias due to deviations from intended interventions | Low risk           | Double-blind.                                                                                |
|                      | bias due to missing outcome data                   | Low risk           | Data for this outcome available for all, or nearly all, participants randomized.             |
|                      | bias in the measurement of the outcome             | Low risk           | Appropriate outcome measures and no intergroup differences; double-blind.                    |
|                      | bias in selection of the reported results          | Low risk           | Data that produced this result analysed in accordance with a pre-specified analysis plan.    |
|                      | bias arising from the randomization process        | Low risk           | Computer-generated random numbers was used in the sequence generation proces                 |
|                      | bias due to deviations from intended interventions | Low risk           | Double-blind.                                                                                |
|                      | bias due to missing outcome data                   | Low risk           | Equal and low dropout rates; ITT analysis used.                                              |
|                      | bias in the measurement of the outcome             | Low risk           | Appropriate outcome measures and no intergroup differences; double-blind.                    |
| ALON A et al.(13)    | bias in selection of the reported results          | Low risk           | Data that produced this result analysed in accordance with a pre-specified analysis plan.    |
|                      | bias arising from the randomization process        | Unclear risk       | "randomised", no details reported.                                                           |
|                      | bias due to deviations from intended interventions | Low risk           | Double-blind; mITT analysis used.                                                            |
|                      | bias due to missing outcome data                   | Low risk           | Equal and low dropout rates.                                                                 |
|                      | bias in the measurement of the outcome             | Low risk           | Appropriate outcome measures and no intergroup differences; double-blind.                    |
| Hung-Chih et al.(18) | bias in selection of the reported results          | Unclear risk       | No protocol available.                                                                       |
|                      | bias arising from the randomization process        | Low risk           | Patients were randomized into the study or control groups by a random-number table sequence. |
|                      | bias due to deviations from intended interventions | Low risk           | Double-blind; ITT analysis used.                                                             |
|                      | bias due to missing outcome data                   | Low risk           | Equal and low dropout rates.                                                                 |

| Study              | Bias                                               | Authors' judgement | Support for judgement                                                                     |
|--------------------|----------------------------------------------------|--------------------|-------------------------------------------------------------------------------------------|
| Jacobs et al.(7)   | bias in the measurement of the outcome             | Low risk           | Appropriate outcome measures and no intergroup differences; double-blind.                 |
|                    | bias in selection of the reported results          | Unclear risk       | No protocol available.                                                                    |
|                    | bias arising from the randomization process        | Low risk           | Detailed randomization.                                                                   |
|                    | bias due to deviations from intended interventions | Low risk           | Double-blind.                                                                             |
|                    | bias due to missing outcome data                   | Low risk           | Equal and low dropout rates.                                                              |
| Carole et al.(23)  | bias in the measurement of the outcome             | Low risk           | Appropriate outcome measures and no intergroup differences; double-blind.                 |
|                    | bias in selection of the reported results          | Low risk           | Data that produced this result analysed in accordance with a pre-specified analysis plan. |
|                    | bias arising from the randomization process        | Low risk           | Detailed randomization.                                                                   |
|                    | bias due to deviations from intended interventions | Low risk           | Double-blind.                                                                             |
|                    | bias due to missing outcome data                   | Low risk           | Equal and low dropout rates; ITT analysis used.                                           |
| Bajorek et al.(12) | bias in the measurement of the outcome             | Low risk           | Appropriate outcome measures and no intergroup differences; double-blind.                 |
|                    | bias in selection of the reported results          | Low risk           | Data that produced this result analysed in accordance with a pre-specified analysis plan. |
|                    | bias arising from the randomization process        | High risk          | Not randomized; no grouping concealment;                                                  |
|                    | bias due to deviations from intended interventions | High risk          | Open-label; no mention about ITT analysis.                                                |
|                    | bias due to missing outcome data                   | Low risk           | Equal and low dropout rates.                                                              |
|                    | bias in the measurement of the outcome             | High risk          | Open-label.                                                                               |
|                    | bias in selection of the reported results          | Unclear risk       | No protocol available.                                                                    |

| Study                  | Bias                                               | Authors' judgement | Support for judgement                                                                     |
|------------------------|----------------------------------------------------|--------------------|-------------------------------------------------------------------------------------------|
| Jean et al.(14)        | bias arising from the randomization process        | Low risk           | Detailed randomization.                                                                   |
|                        | bias due to deviations from intended interventions | Low risk           | Double-blind.                                                                             |
|                        | bias due to missing outcome data                   | Low risk           | Equal and low dropout rates; ITT analysis used.                                           |
|                        | bias in the measurement of the outcome             | Low risk           | Appropriate outcome measures and no intergroup differences; double-blind.                 |
|                        | bias in selection of the reported results          | Low risk           | Data that produced this result analysed in accordance with a pre-specified analysis plan. |
| Jean-Michel et al.(16) | bias arising from the randomization process        | Low risk           | Detailed randomization.                                                                   |
|                        | bias due to deviations from intended interventions | Low risk           | Double-blind.                                                                             |
|                        | bias due to missing outcome data                   | Low risk           | Equal and low dropout rates; ITT analysis used.                                           |
|                        | bias in the measurement of the outcome             | Low risk           | Appropriate outcome measures and no intergroup differences; double-blind.                 |
|                        | bias in selection of the reported results          | Low risk           | Data that produced this result analysed in accordance with a pre-specified analysis plan. |
| Manzano et al.(19)     | bias arising from the randomization process        | Low risk           | Detailed randomization.                                                                   |
|                        | bias due to deviations from intended interventions | High risk          | Using per-protocol analysis.                                                              |
|                        | bias due to missing outcome data                   | Low risk           | Equal and low dropout rates.                                                              |
|                        | bias in the measurement of the outcome             | Low risk           | Appropriate outcome measures and no intergroup differences; double-blind.                 |
|                        | bias in selection of the reported results          | High risk          | Multiple eligible analyses of the data.                                                   |
| Giuseppe et al.(21)    | bias arising from the randomization process        | Low risk           | Detailed randomization.                                                                   |
|                        | bias due to deviations from intended interventions | Low risk           | Double-blind.                                                                             |

| Study                      | Bias                                               | Authors' judgement | Support for judgement                                                                             |
|----------------------------|----------------------------------------------------|--------------------|---------------------------------------------------------------------------------------------------|
| Stephan<br>e et<br>al.(17) | bias due to missing outcome data                   | Low risk           | Equal and low dropout rates; ITT analysis used.                                                   |
|                            | bias in the measurement of the outcome             | Low risk           | Appropriate outcome measures and no intergroup differences; double-blind.                         |
|                            | bias in selection of the reported results          | Low risk           | Data that produced this result analysed in accordance with a pre-specified analysis plan.         |
|                            | bias arising from the randomization process        | Low risk           | Infants were assigned to their treatment groups according to a pre-established randomization list |
|                            | bias due to deviations from intended interventions | Low risk           | Double-blind.                                                                                     |
|                            | bias due to missing outcome data                   | Low risk           | Equal and low dropout rates; ITT analysis used.                                                   |
|                            | bias in the measurement of the outcome             | Low risk           | Appropriate outcome measures and no intergroup differences; double-blind.                         |
|                            | bias in selection of the reported results          | Unclear risk       | No protocol available.                                                                            |

**Table S4 Detailed description of the adverse events for each included study**

| Study                  | Publication year | Outcomes <sup>1</sup> | Any adverse events                                                                                                                                                                                                             | Serious adverse events                                                                                                                                                          |
|------------------------|------------------|-----------------------|--------------------------------------------------------------------------------------------------------------------------------------------------------------------------------------------------------------------------------|---------------------------------------------------------------------------------------------------------------------------------------------------------------------------------|
| Shashidhar et al.(24)  | 2017             | a, b, d               | -                                                                                                                                                                                                                              | death (1 vs. 3)                                                                                                                                                                 |
| Qiao et al.(22)        | 2017             | a, c                  | Feeding (5 vs. 14) intolerance                                                                                                                                                                                                 | -                                                                                                                                                                               |
| Agus al.(15)           | 2011             | a, c, d               | Rhinitis<br>Upper respiratory tract infection<br>Diarrhea<br>Fever<br>Coughing Stomatitis<br>Conjunctivitis Vomiting<br>Furunculosis Dermatitis, etc.<br>Nosocomial infections (21 vs. 26)                                     | 2: typhoid fever and dengue encephalopathy<br>4: typhoid fever; fever and febrile seizures; fever, diarrhea, and dehydration; fever, icteric and alcoholic stool, and hepatitis |
| Carole et al.(23)      | 2009             | b, c                  | -                                                                                                                                                                                                                              | -                                                                                                                                                                               |
| Bajorek et al.(12)     | 2021             | c, d                  | -                                                                                                                                                                                                                              | 2 deaths in control group                                                                                                                                                       |
| Jean al.(14)           | 2008             | c                     | Gastroenteritis<br>Gastroesophageal reflux disease<br>Diarrhea<br>Milk allergy Vomiting<br>Febrile infection Surgery<br>Pyrexia<br>Rectal hemorrhage<br>Pyelonephritis<br>Bronchiolitis Cough<br>Drug toxicity Inguinal hernia |                                                                                                                                                                                 |
| Jean-Michel et al.(16) | 2011             | c                     | Gastrointestinal Upper respiratory<br>Lower respiratory<br>Allergy-skin problems<br>urinary tract infection, moniliasis, conjunctivitis, and fever                                                                             |                                                                                                                                                                                 |

|                        |      |         |                                                                                                                                                                                                                                                                                  |             |
|------------------------|------|---------|----------------------------------------------------------------------------------------------------------------------------------------------------------------------------------------------------------------------------------------------------------------------------------|-------------|
| Manzano<br>et al.(19)  | 2017 | c       | Gastrointestinal disorder<br>Infections and infestations<br>Bone and joint injuries<br>Nervous system disorders<br>Respiratory, thoracic and<br>mediastinal disorders<br>Skin and subcutaneous<br>tissue disorders<br>Eye disorders<br>Ear and labyrinth disorders<br>Fever(LLT) |             |
| Giuseppe<br>et al.(21) | 2007 | c, d    | respiratory tract system<br>(bronchiolitis and cough), etc.                                                                                                                                                                                                                      | death, etc. |
| Stephane<br>et al.(17) | 2015 | b, c, d | no details                                                                                                                                                                                                                                                                       | death, etc. |

<sup>1</sup> a, weight gain; b, necrotizing enterocolitis; c, any adverse events; d, serious adverse events

2.1 Supplementary Figures

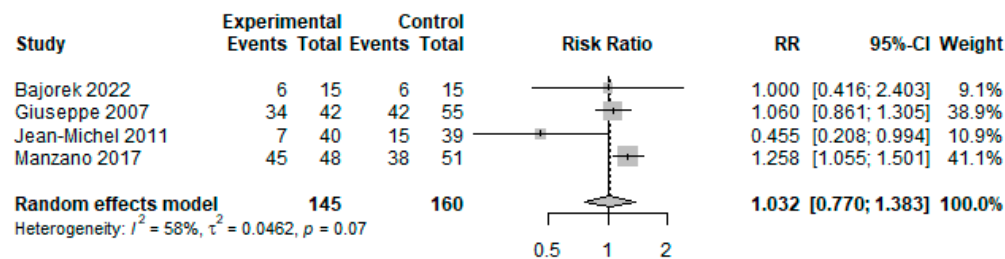

Figure S1. Forest plot comparing the rates of any adverse events for intervention group versus control group in sensitivity analyses on studies containing only *Bifidobacterium longum* and its subspecies as an intervention group. CI, Confidence interval; RR, risk ratio.

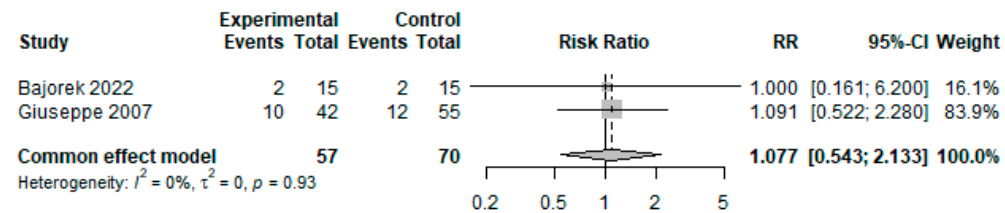

Figure S2. Forest plot comparing the rates of severe adverse events for intervention group versus control group in sensitivity analyses on studies containing only *Bifidobacterium longum* and its subspecies as an intervention group. CI, Confidence interval; RR, risk ratio

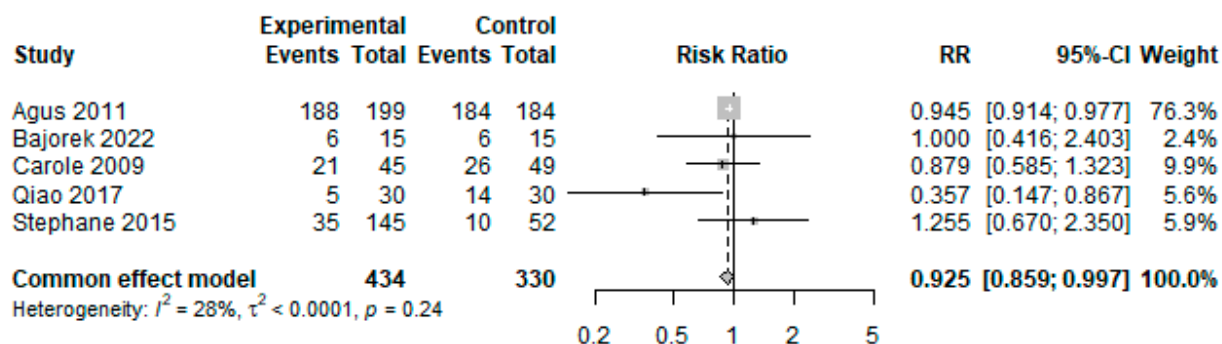

**Figure S3. Forest plot comparing the rates of any adverse events for intervention group versus control group in sensitivity analyses among infants below 37-week gestation.** CI, Confidence interval; RR, risk ratio

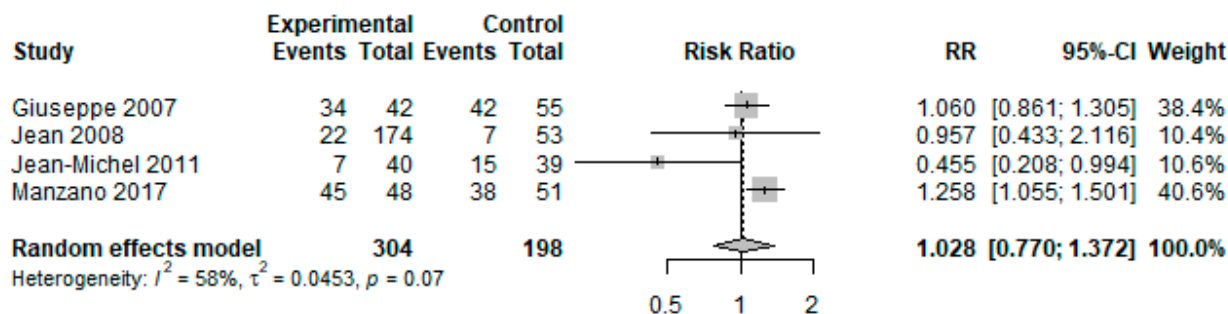

**Figure S4. Forest plot comparing the rates of severe adverse events for intervention group versus control group in sensitivity analyses among infants at or above 37-week gestation.** CI, Confidence interval; RR, risk ratio



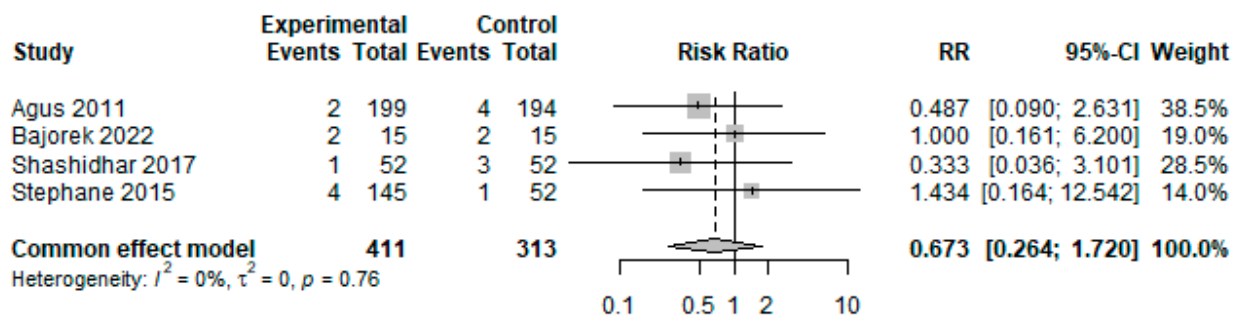

**Figure S5. Forest plot comparing the rates of severe adverse events for intervention group versus control group in sensitivity analyses among infants below 37-week gestation. CI, Confidence interval; RR, risk ratio**
